# Supplementary material
Source: PubMed Central journal article supplement (PMC6317895)
Supplement: NIHMS938142-supplement-1.pdf [file NIHMS938142-supplement-1.pdf]

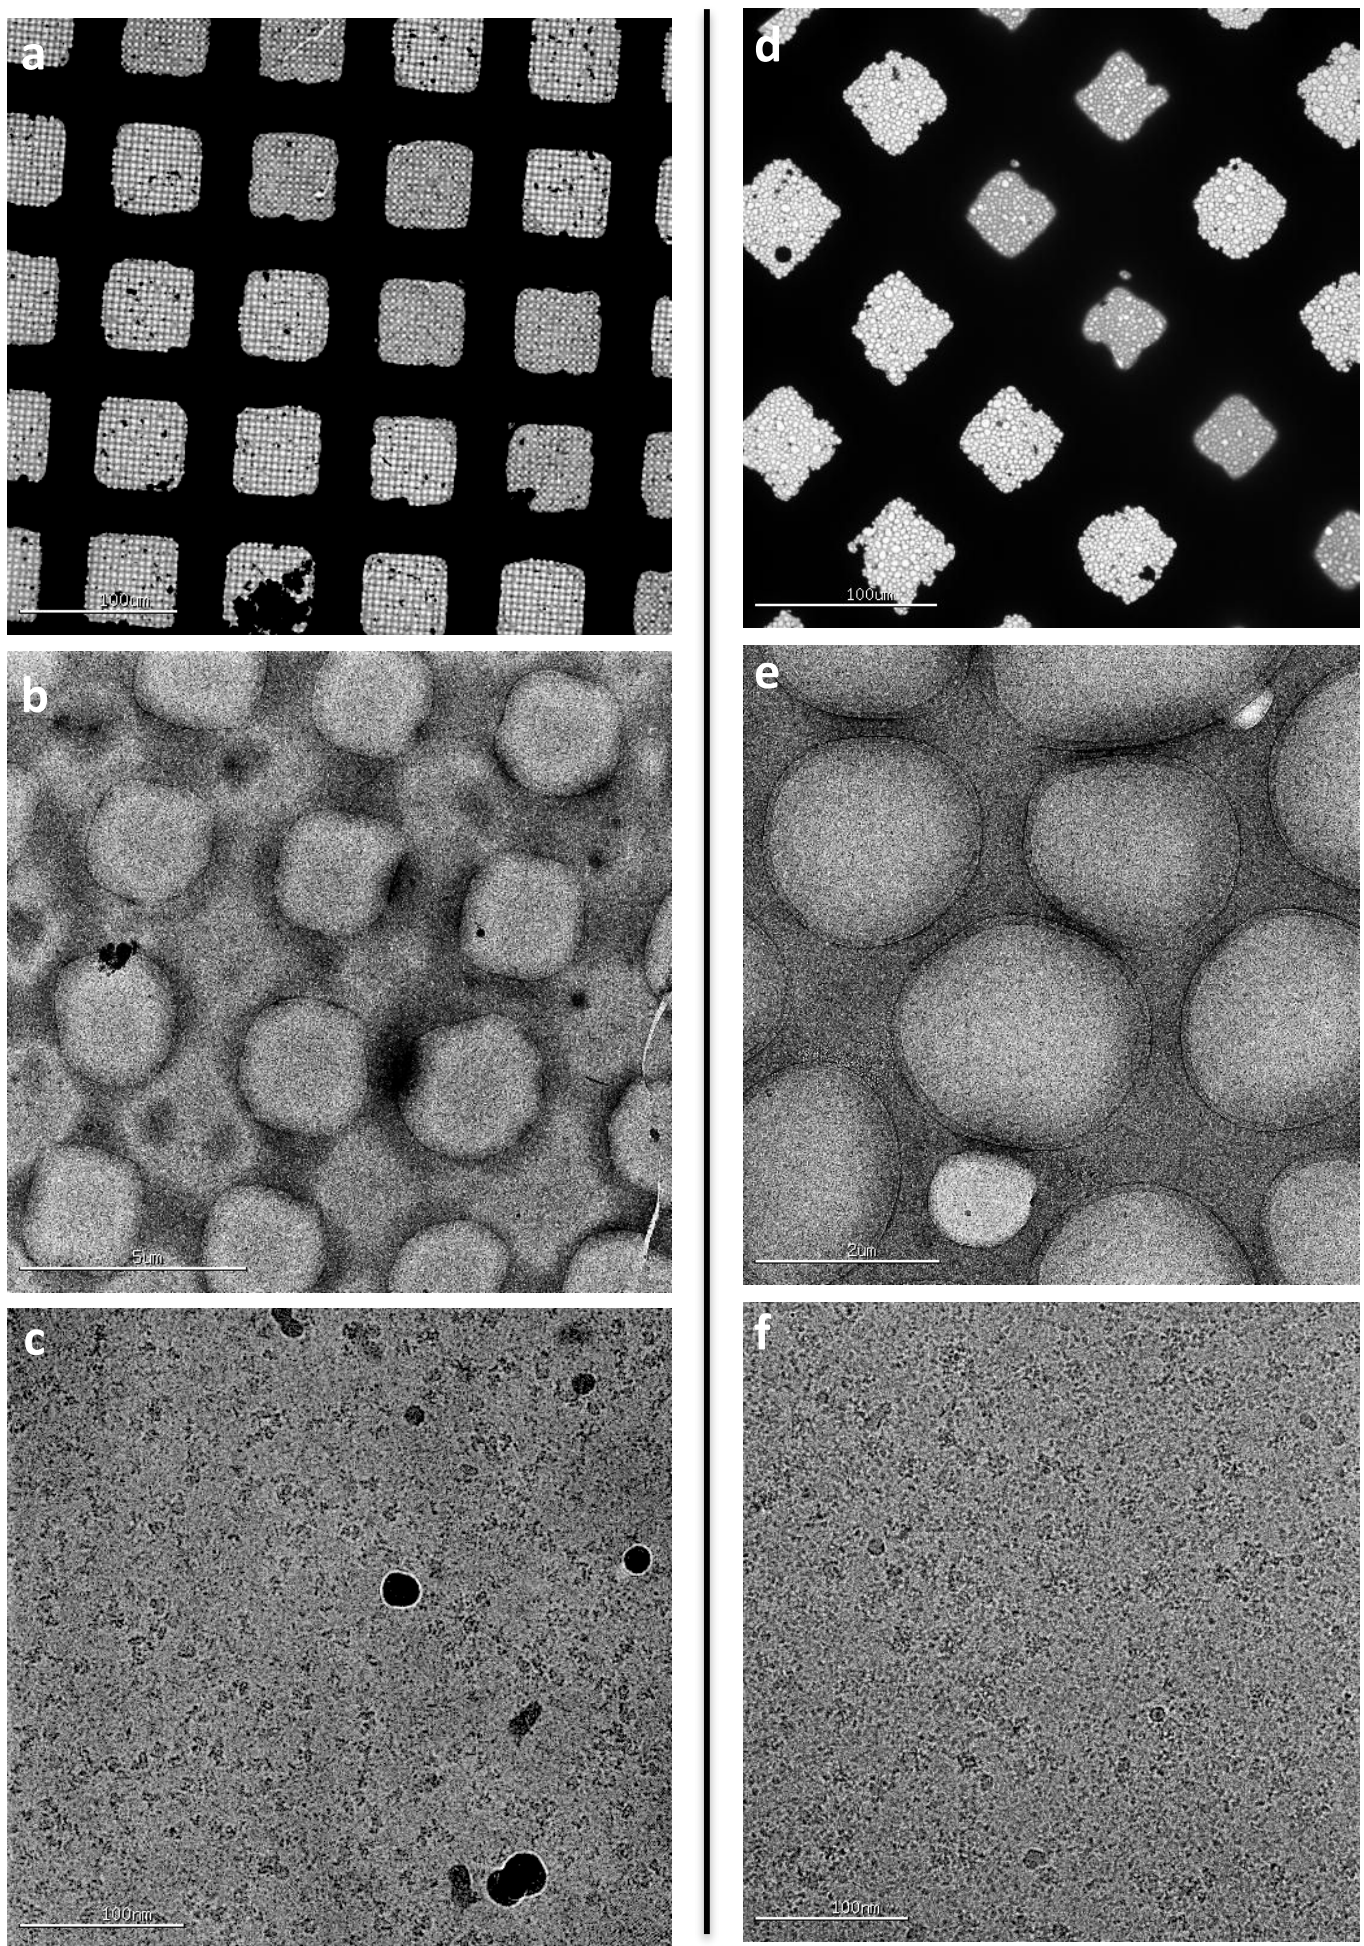

Figure 8: (a-c) Sequentially higher magnification images of a vitrified sample of an integral membrane protein in a nanodisc. (d-f) Sequentially higher magnification images of a vitrified sample of an HIV trimer prepared in the presence of detergent.
